# Supplementary material
Source: Research Square preprint supplement (doi:10.21203/rs.3.rs-9662129/v1)
Supplement: Supplementary file 1 [file c06b15921b1145da446704ef.docx]

**Table 1. SiRNA Sequences**

| FN1-1 | Forward | GGUGGACUGUACUUGUCUATT |
| --- | --- | --- |
| Reverse | UAGACAAGUACAGUCCACCTT |
| FN1-2 | Forward | GCAGUAGCACAGAGCUCAATT |
| Reverse | UUGAGCUCUGUGCUACUGCTT |
| FN1-3 | Forward | GCUAUUACAGAAUCACCUATT |
| Reverse | UAGGUGAUUCUGUAAUAGCTT |
| FOXC1-1 | Forward | CGUCUAUGACUGUAGCAAATT |
| Reverse | UUUGCUACAGUCAUAGACGTT |
| FOXC1-2 | Forward | GGCACAACCUCUCGCUCAATT |
| Reverse | UUGAGCGAGAGGUUGUGCCTT |

**Table 2. RT-qPCR primers**

| FN1 | Forward | GAGAATAAGCTGTACCATCGCAA |
| --- | --- | --- |
| Reverse | CGACCACATAGGAAGTCCCAG |
| TNF-a | Forward | CCCACGTCGTAGCAAACCAC |
| Reverse | GCAGCCTTGTCCCTTGAA |
| Nos2 | Forward | GTTCTCAGCCCAACAATACAAGA |
| Reverse | GTGGACGGGTCGATGTCAC |
| IL-1β | Forward | TCATCTCGGAGCCTGTAGTG |
| Reverse | AGAGCATCCAGCTTCAAATC |
| IL-6 | Forward | ACTCTGGCTTTGTCTTTCTTGTTATCT |
| Reverse | TGTATGAACAACGATGATGCACTT |
| IL-12 | Forward | ACAGGTGAGGTTCACTGTTTCT |
| Reverse | TGGTTTGCCATCGTTTTGCTG |
| Mrc1 | Forward | CTCTGTTCAGCTATTGGACGC |
| Reverse | CGGAATTTCTGGGATTCAGCTTC |
| Chil3 | Forward | AAGAACACTGAGCTAAAAACTCTCCT |
| Reverse | GAGACCATGGCACTGAACG |
| Fizz1 | Forward | CCCTCCACTGTAACGAAGACTC |
| Reverse | CACACCCAGTAGCAGTCATCC |
| Actin | Forward | GTGACGTTGACATCCGTAAAGA |
| Reverse | GCCGGACTCATCGTACTCC |

**Table 3. Antibodies**

| Target | Dilution | Application | Vendor |
| --- | --- | --- | --- |
| FN1 | 1:1000 | WB | Abcam |
| PI3K | 1:1000 | WB | Affinity Biosciences |
| Phospho-PI3K | 1:1000 | WB | Affinity Biosciences |
| AKT1 | 1:1000 | WB | Selleck |
| Phospho-AKT1 | 1:1000 | WB | Selleck |
| AKT2 | 1:1000 | WB | Selleck |
| Phospho-AKT2 | 1:1000 | WB | Selleck |
| STAT1 | 1:1000 | WB | Beyotime |
| Phospho-STAT1 | 1:1000 | WB | Selleck |
| STAT6 | 1:1000 | WB | ZEN-BIO |
| Phospho-STAT6 | 1:1000 | WB | Selleck |
| β-actin | 1:2000 | WB | Proteintech |
| HRP-conjugated goat | 1:10000 | WB | Jihua Biotechnology Services |
| F4/80 | 1:1000 | IF | Immumoway |
| FN1 | 1:1000 | IF | Abcam |
| GZMB | 5 μL/test | FC | Biolegend |
| IFN-γ | 5 μL/test | FC | Biolegend |

WB*:Western blot; IF**: Immunofluorescence; FC*** : Flow Cytometry

Figure S1


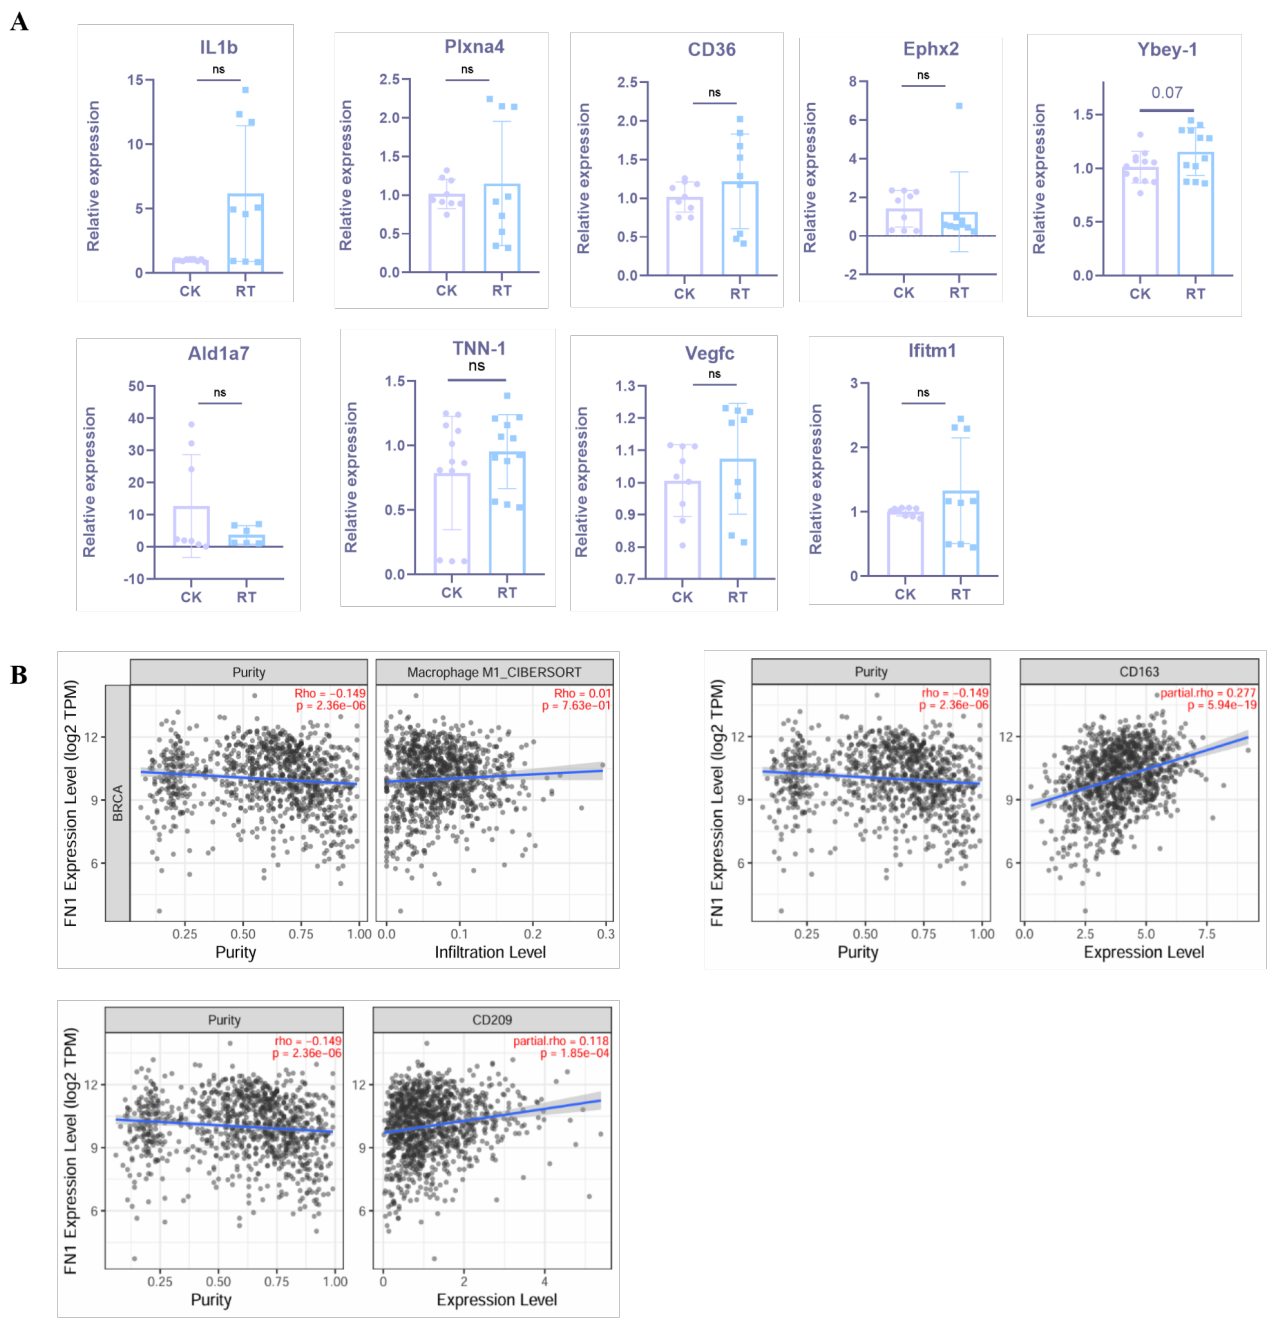


**Supplementary Figure1. Differential gene expression and correlation analysis**

（A）IL-1β、Plxna4、CD36、Ephx2、Ybey、Ald1a7、TNN-1、Vegfc and Ifitm1 mRNA levels in distal tumors from irradiated and control mice. （B）Analysis of the correlation between FN1 expression and M1 macrophage markers, including the immunosuppressive receptors CD163 and CD209, using the TIMER2 database. Data in (A) are shown as mean ± SD (n = 9). ns, not significant (*P* > 0.05) by two-sided Student’s t test.

Figure S2


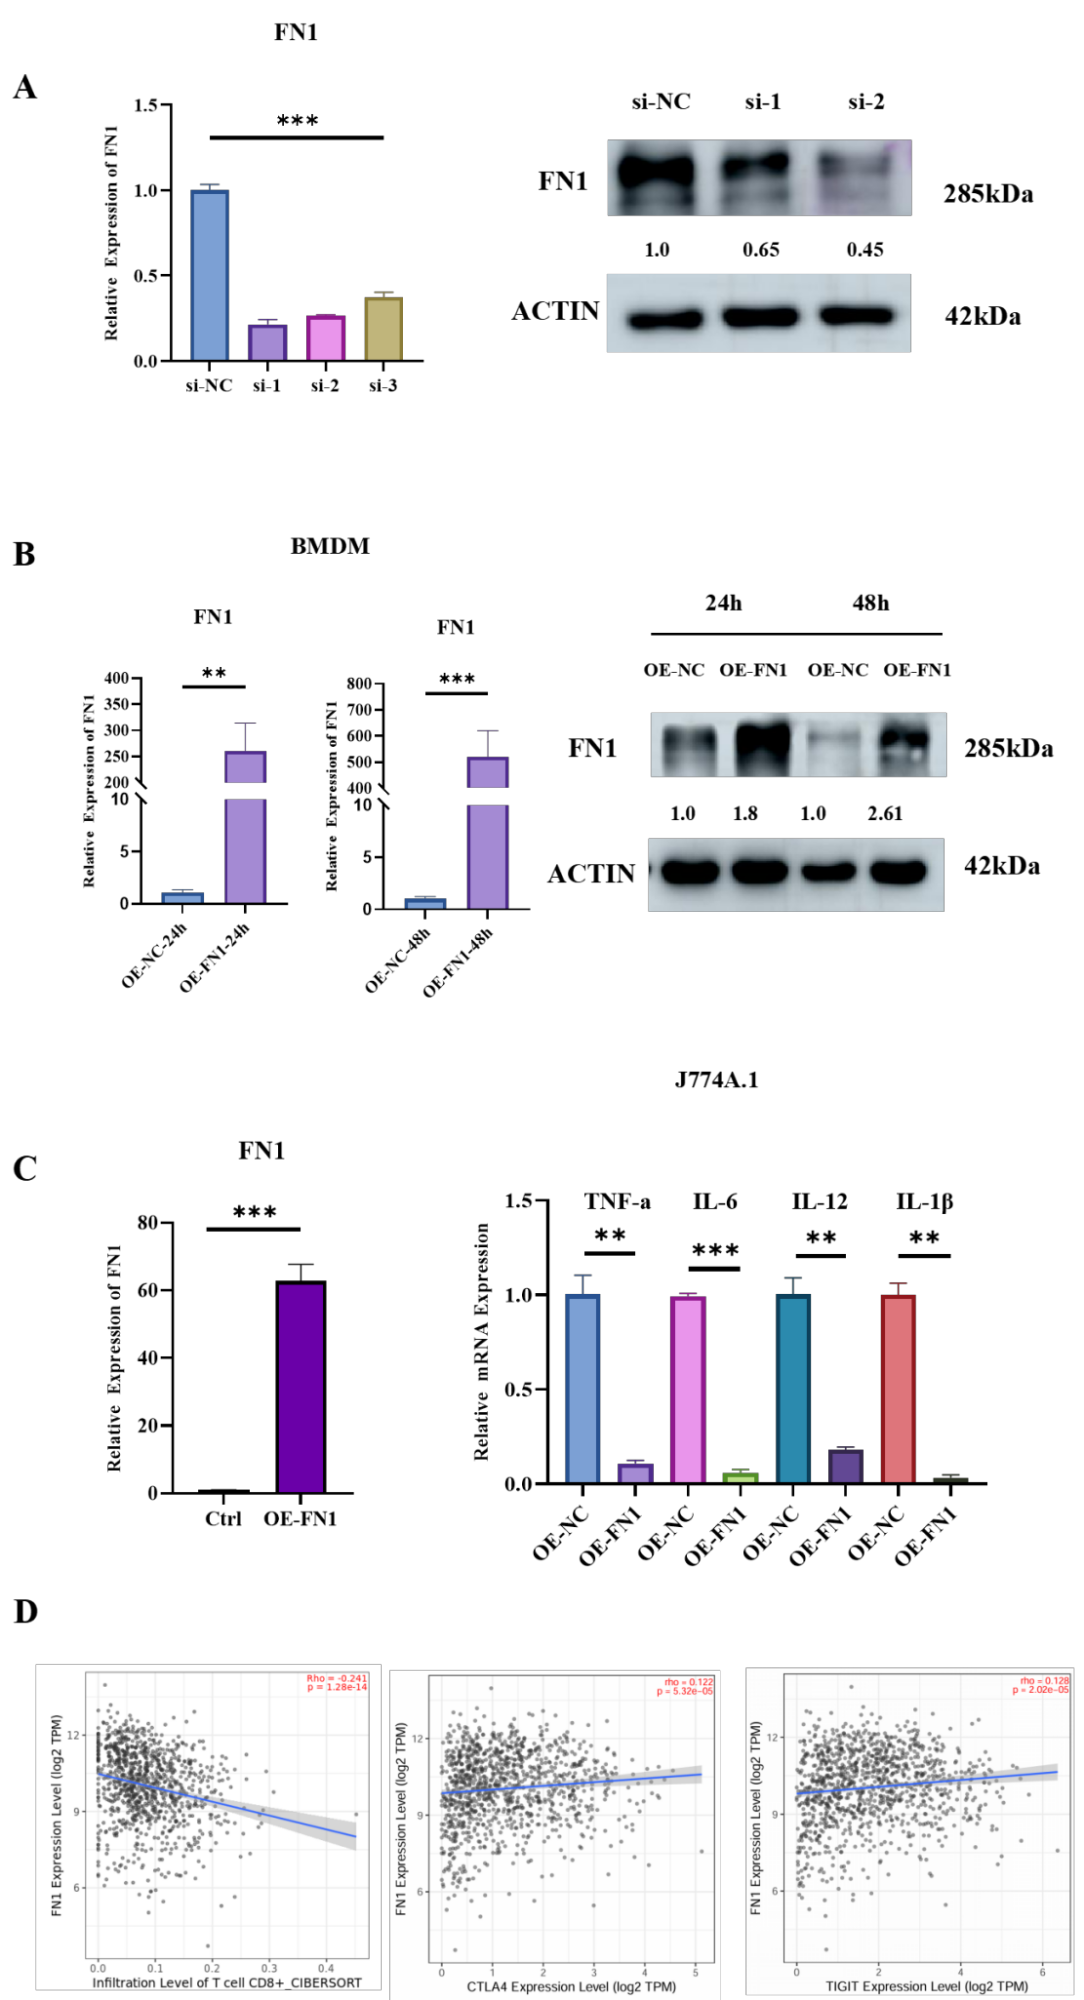


**Supplementary Figure** **2. Efficiency of FN1 genetic manipulation in macrophages and related analyses**

(A) Knockdown efficiency of FN1 in BMDMs assessed by RT-qPCR and Western blot.(B) Overexpression efficiency of FN1 in BMDMs assessed by RT-qPCR and Western blot.(C) Overexpression efficiency of FN1 and expression levels of immunostimulatory genes in J774A.1 cells, as determined by RT-qPCR.(D) Correlation analysis between FN1 expression and CD8⁺ T cells along with their immunosuppressive receptors, based on the TIMER2 database. Data in (A) are shown as mean± SD (n = 3). ****P* < 0.001 by One-Way ANOVA. Data in (B) and (C) are shown as mean ± SD (n = 3). ****P* < 0.001, ***P* < 0.01 by two-sided Student’s t test.

Figure S3


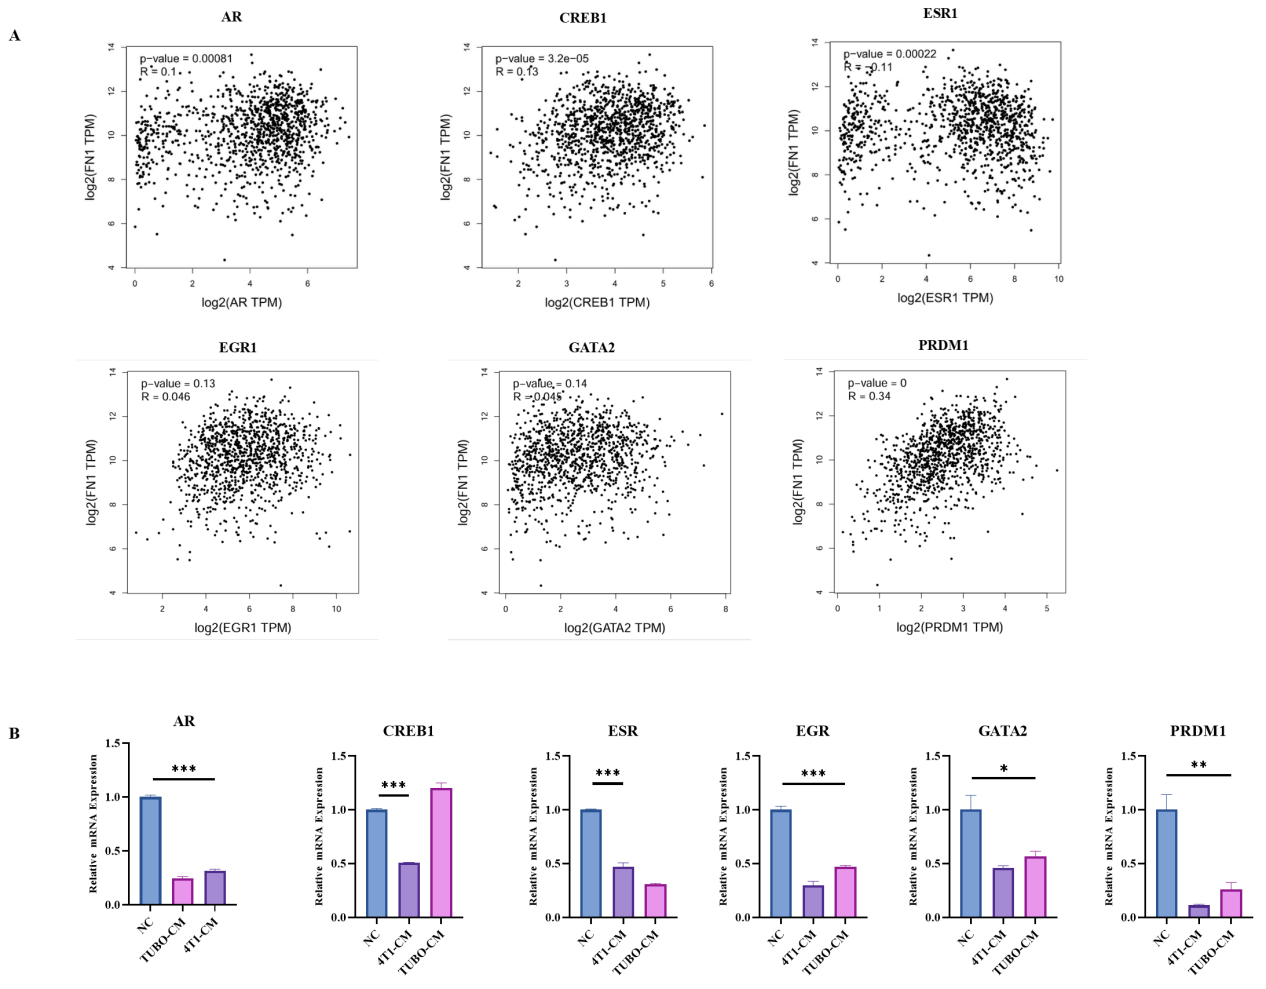


**Supplementary Figure** **3. Analysis of Gene Correlation with FN1 and Expression in the RIAE Model**

（A）Analyze the correlation between FN1 and AR, CREB1, ESR1, EGR1, GATA2, and PRDM1 by GEPIA2.（B）AR、CREB1、ESR1、EGR1、GATA2 and PRDM1 mRNA expression levels in the in vitro RIAE model. Data in (B) are shown as mean± SD (n = 3). *P < 0.05 by Repeated Measures ANOVA.
